# Supplementary material for: Radiation synthesis of imidazolium ionic liquid grafted PVDF as the anion exchange membrane for vanadium redox flow batteries
Source: Royal Society of Chemistry journal article supplement (doi:10.1039/d2nj05386a), 2023-01-01
Supplement: d2nj05386a1.pdf [file d2nj05386a1.pdf]

## Support information

### **Radiation synthesis of imidazolium ionic liquid grafted PVDF as anion exchange membrane for vanadium redox flow battery**

*Zhiguo Wang<sup>a,b</sup>, Jiali Jiang<sup>a,c</sup>, Zhen Dong<sup>a</sup>, Yifei Song<sup>a,c</sup>, Long Zhao<sup>a\*</sup>*

<sup>a</sup> State Key Laboratory of Advanced Electromagnetic Engineering and Technology, School of Electrical and Electronic Engineering, Huazhong University of Science and Technology, Wuhan 430074, China.

<sup>b</sup> China-EU Institute for Clean and Renewable Energy, Huazhong University of Science and Technology, Wuhan 430074, China.

<sup>c</sup> School of Chemistry and Chemical Engineering, Huazhong University of Science and Technology, Wuhan 430074, China.

\*Corresponding author at: School of Electrical and Electronic Engineering, Huazhong University of Science and Technology, Wuhan 430074, China.

E-mail address: [zhaolong@hust.edu.cn](mailto:zhaolong@hust.edu.cn); [ryuuchou@hotmail.com](mailto:ryuuchou@hotmail.com).

**FIGURES:**

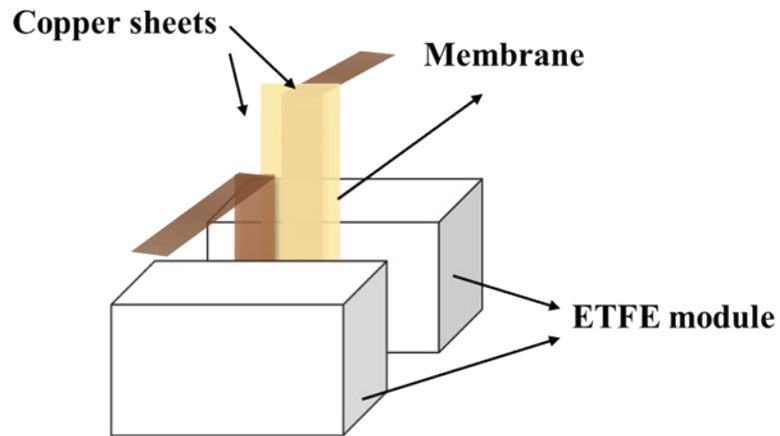

Fig. S1. The test mold of ionic conductivity.

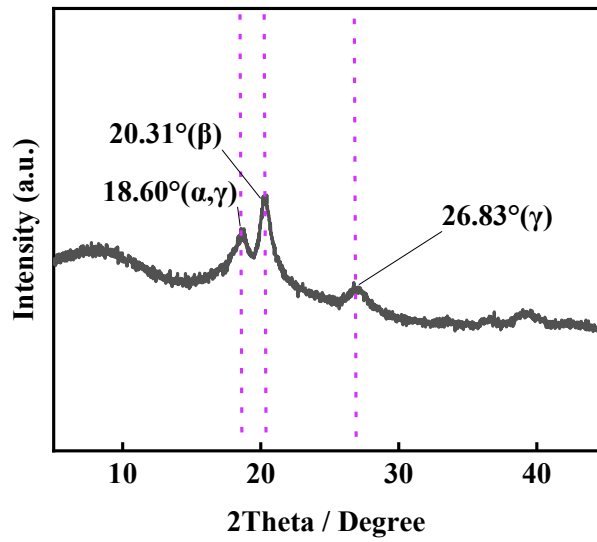

Fig. S2. The XRD spectra of the neat PVDF membrane.

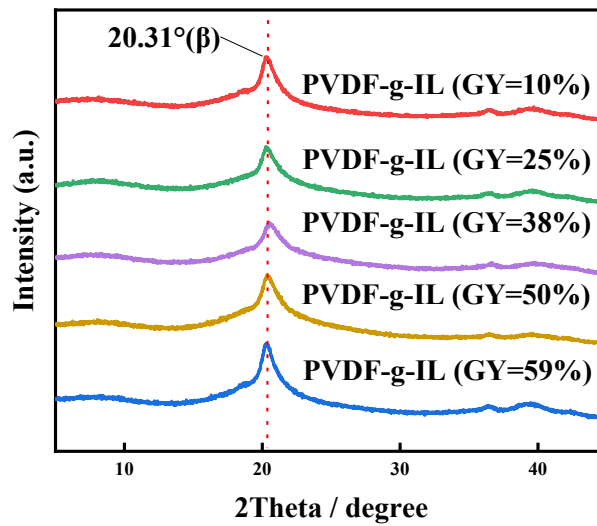

Fig. S3. The XRD spectra of the PVDF-g-IL membranes.

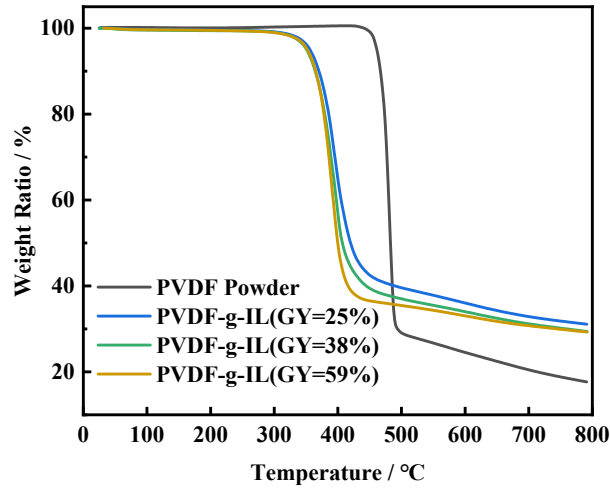

Fig. S4. The TGA curves of PVDF and PVDF-g-IL powders.

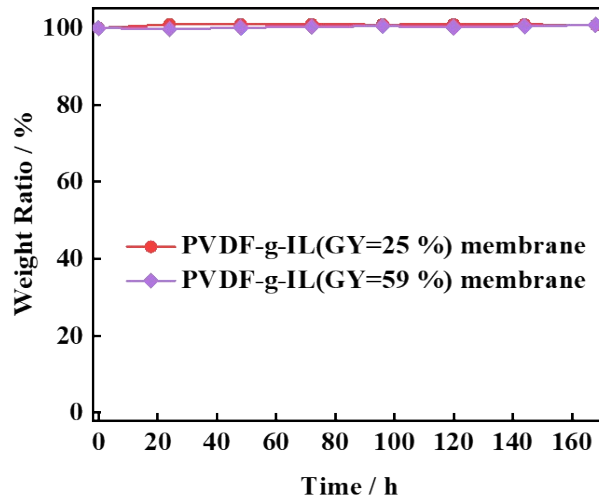

Fig. S5. The weight loss of the grafted membranes after ethanol treatment.

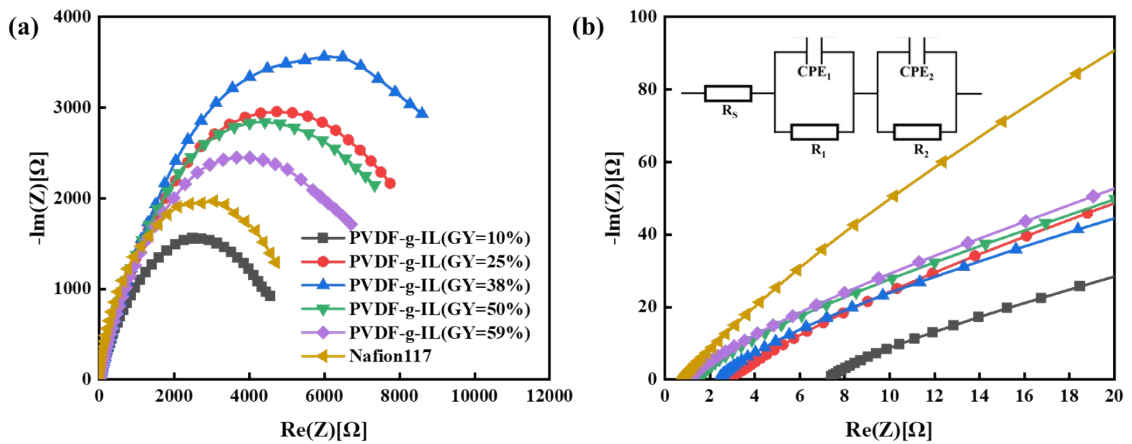

Fig. S6. (a)The EIS curves and (b)the enlarged EIS curves and the equivalent circuit model of the PVDF-g-IL membranes and Nafion117.

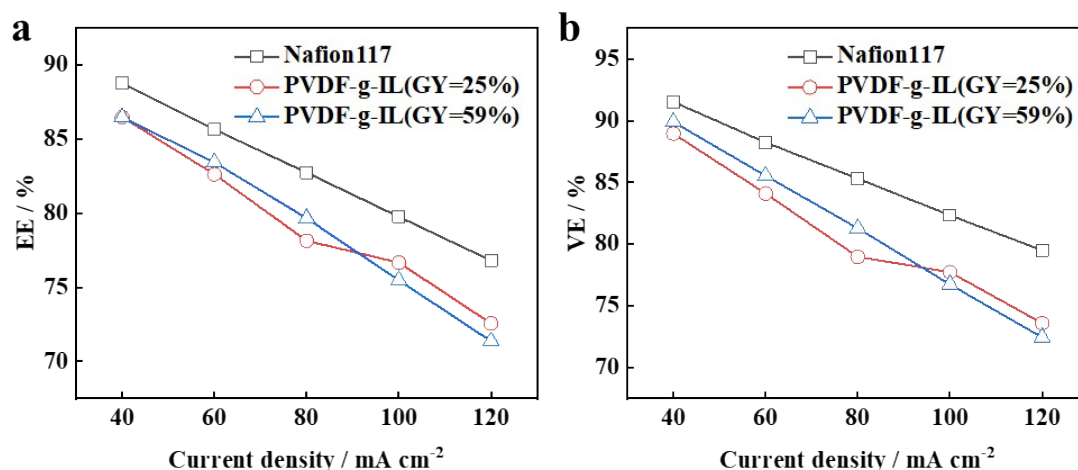

Fig. S7. The EEs (a) and VEs (b) of the PVDF-g-IL (GY=25% and 59%) membrane and Nafion117.

TABLE:

Table S1 The comparison of some AEMs in other works.

| Sample            | WU (%) | IEC (mmol/g) | Ion conductivity (mS/cm) | permeability ( $\times 10^{-7}$ cm/min) | refs      |
|-------------------|--------|--------------|--------------------------|-----------------------------------------|-----------|
| PVDF-g-IL(GY=25%) | 12.10  | 1.49         | 9.05                     | 0.98                                    | This work |
| PVDF-g-IL(GY=59%) | 9.31   | 1.68         | 30.43                    | 0.57                                    | This work |
| DQA-TAPFE-20      | 18.2   | 1.55         | 10.1                     | 0.031                                   | [1]       |
| QA-PAE-20         | 17.4   | 1.61         | 7.2                      | 0.32                                    | [2]       |
| PBI-GTA-112%      | 30     | 2.4          | 9.68                     | 2.18                                    | [3]       |
| ETFE-g-PDMAEMA40  | 21.5   | 1.7          | -                        | 0.05                                    | [4]       |
| PSf-PhBIm1.2      | 25.3   | 1.32         | 12.7                     | 8.52                                    | [5]       |

Table S2 The efficiency performance comparison of PVDF-IL(GY=25%) membrane with the commercial anion-exchange membranes [6].

| Sample          | Thickness ( $\mu\text{m}$ ) | Ion conductivity (mS/cm) | Permeability ( $\times 10^{-7}$ cm/min) | CE (%) | VE (%) | EE (%) |
|-----------------|-----------------------------|--------------------------|-----------------------------------------|--------|--------|--------|
| FAP-PP-475      | 70                          | 17.8                     | 22.4                                    | 92.6   | 85     | 78.7   |
| FAP-PE-420      | 20                          | 5                        | 11.6                                    | 91.0   | 86     | 78.0   |
| APS             | 150                         | 176                      | 2.5                                     | 89.3   | 87     | 77.7   |
| PVDF-IL(GY=25%) | 123                         | 9.05                     | 0.98                                    | 98.25  | 84.10  | 82.63  |

Table S3. The cost of the material and radiation for preparing 1 m<sup>2</sup> membrane

| Material                 | Unit price      | Required amount | Cost             |
|--------------------------|-----------------|-----------------|------------------|
| [VEIm][BF <sub>4</sub> ] | \$72.8 / 100g   | 60g             | \$43.68          |
| PVDF                     | \$37.8 / kg     | 40g             | \$1.52           |
| Ethanol                  | \$1 / 500ml     | 1000ml          | \$2              |
| NMP                      | \$4 / L         | 500ml           | \$2              |
| Radiation                | \$500-700 / ton | 40 g PVDF       | \$0.02-0.028     |
| Overall                  |                 |                 | \$49.22-\$49.228 |

## Reference

- [1] Y. Chen, Y. Li, J. Xu, S. Chen and D. Chen, ACS Applied Materials & Interfaces, 2021, 13, 18923-18933.
- [2] Y. Hu, B. Wang, X. Li, D. Chen and W. Zhang, Journal of Power Sources, 2018, 387, 33-42.
- [3] Y. Du, L. Gao, L. Hu, M. Di, X. Yan, B. An and G. He, Journal of Membrane Science, 2020, 603.
- [4] J. Qiu, M. Li, J. Ni, M. Zhai, J. Peng, L. Xu, H. Zhou, J. Li and G. Wei, Journal of Membrane Science, 2007, 297, 174-180.
- [5] Y. Xing, K. Geng, X. Chu, C. Wang, L. Liu and N. Li, Journal of Membrane Science, 2021, 618, 118696.
- [6] G.-J. Hwang, S.-W. Kim, D.-M. In, D.-Y. Lee and C.-H. Ryu, Journal of Industrial and Engineering Chemistry, 2018, 60, 360-365.
